# Supplementary material for: Iron Overload Is Associated With Oxidative Stress and Nutritional Immunity During Viral Infection in Fish
Source: Front Immunol. 2018 Jun 5;9:1296. doi: 10.3389/fimmu.2018.01296 (PMC5996096; doi:10.3389/fimmu.2018.01296)
Supplement: Supplementary file 2 [file table_2.xlsx]

## Sheet: Hoja1
Supplementary Table 2. Functional enrichment for downregulated genes using KEGG pathway
Term	Count	PValue	Genes
dre00190:Oxidative phosphorylation	71	0.000407752	ENSDARG00000095897, ENSDARG00000036438, ENSDARG00000037259, ENSDARG00000051986, ENSDARG00000076318, ENSDARG00000013443, ENSDARG00000038028, ENSDARG00000098355, ENSDARG00000019404, ENSDARG00000023967, ENSDARG00000070083, ENSDARG00000041417, ENSDARG00000036577, ENSDARG00000074552, ENSDARG00000059128, ENSDARG00000022315, ENSDARG00000001788, ENSDARG00000017775, ENSDARG00000019332, ENSDARG00000011175,…
dre01200:Carbon metabolism	51	428241	ENSDARG00000015918, ENSDARG00000007294, ENSDARG00000040988, ENSDARG00000037506, ENSDARG00000012199, ENSDARG00000005423, ENSDARG00000025012, ENSDARG00000057571, ENSDARG00000041068, ENSDARG00000022456, ENSDARG00000019702, ENSDARG00000052712, ENSDARG00000075132, ENSDARG00000045888, ENSDARG00000017772, ENSDARG00000012366, ENSDARG00000103364, ENSDARG00000043371, ENSDARG00000034270, ENSDARG00000016733,…
dre01100:Metabolic pathways	285	1.60626e+07	ENSDARG00000069857, ENSDARG00000012199, ENSDARG00000005423, ENSDARG00000025012, ENSDARG00000013443, ENSDARG00000041728, ENSDARG00000057571, ENSDARG00000041068, ENSDARG00000038028, ENSDARG00000035577, ENSDARG00000012745, ENSDARG00000103811, ENSDARG00000015709, ENSDARG00000041417, ENSDARG00000013856, ENSDARG00000036820, ENSDARG00000036577, ENSDARG00000058114, ENSDARG00000019702, ENSDARG00000006031,…
dre00020:Citrate cycle (TCA cycle)	18	4.87527e+10	ENSDARG00000015918, ENSDARG00000007294, ENSDARG00000023648, ENSDARG00000043371, ENSDARG00000103364, ENSDARG00000005359, ENSDARG00000034270, ENSDARG00000030139, ENSDARG00000012387, ENSDARG00000014230, ENSDARG00000021346, ENSDARG00000030278, ENSDARG00000016721, ENSDARG00000075768, ENSDARG00000052712, ENSDARG00000075132, ENSDARG00000099079, ENSDARG00000017772
dre00010:Glycolysis / Gluconeogenesis	26	2.1736e+12	ENSDARG00000012366, ENSDARG00000015918, ENSDARG00000039914, ENSDARG00000040988, ENSDARG00000014287, ENSDARG00000011665, ENSDARG00000013561, ENSDARG00000019644, ENSDARG00000005423, ENSDARG00000012387, ENSDARG00000025012, ENSDARG00000099860, ENSDARG00000021346, ENSDARG00000057571, ENSDARG00000057661, ENSDARG00000099730, ENSDARG00000028000, ENSDARG00000101251, ENSDARG00000022456, ENSDARG00000060797,…
dre00620:Pyruvate metabolism	15	0.008589092528717184	ENSDARG00000015918, ENSDARG00000068264, ENSDARG00000043371, ENSDARG00000002305, ENSDARG00000019644, ENSDARG00000012387, ENSDARG00000021346, ENSDARG00000099860, ENSDARG00000099730, ENSDARG00000101251, ENSDARG00000075132, ENSDARG00000068978, ENSDARG00000045888, ENSDARG00000017772, ENSDARG00000078512
dre00640:Propanoate metabolism	11	0.012557376448795128	ENSDARG00000038910, ENSDARG00000005359, ENSDARG00000101251, ENSDARG00000052712, ENSDARG00000019644, ENSDARG00000028982, ENSDARG00000001578, ENSDARG00000053485, ENSDARG00000006031, ENSDARG00000045888, ENSDARG00000078512
dre00051:Fructose and mannose metabolism	13	0.03355271647783509	ENSDARG00000012366, ENSDARG00000040988, ENSDARG00000011665, ENSDARG00000025012, ENSDARG00000057661, ENSDARG00000028000, ENSDARG00000019702, ENSDARG00000060797, ENSDARG00000039666, ENSDARG00000002037, ENSDARG00000030786, ENSDARG00000039452, ENSDARG00000026629
dre01230:Biosynthesis of amino acids	36	7.94467e+07	ENSDARG00000007294, ENSDARG00000054849, ENSDARG00000040988, ENSDARG00000037506, ENSDARG00000040334, ENSDARG00000012199, ENSDARG00000005423, ENSDARG00000025012, ENSDARG00000099860, ENSDARG00000057661, ENSDARG00000057571, ENSDARG00000041068, ENSDARG00000022456, ENSDARG00000019702, ENSDARG00000100003, ENSDARG00000043457, ENSDARG00000040314, ENSDARG00000033361, ENSDARG00000054191, ENSDARG00000023648,…
dre00250:Alanine, aspartate and glutamate metabolism	16	0.0013835652892128475	ENSDARG00000016375, ENSDARG00000017049, ENSDARG00000101074, ENSDARG00000012199, ENSDARG00000027419, ENSDARG00000041068, ENSDARG00000044094, ENSDARG00000077256, ENSDARG00000015537, ENSDARG00000055642, ENSDARG00000099517, ENSDARG00000039093, ENSDARG00000100003, ENSDARG00000006031, ENSDARG00000033361, ENSDARG00000062812
dre00270:Cysteine and methionine metabolism	17	0.0014171069390053676	ENSDARG00000039343, ENSDARG00000013430, ENSDARG00000043371, ENSDARG00000074301, ENSDARG00000019644, ENSDARG00000040334, ENSDARG00000015566, ENSDARG00000039605, ENSDARG00000056331, ENSDARG00000041068, ENSDARG00000043856, ENSDARG00000101251, ENSDARG00000005394, ENSDARG00000010946, ENSDARG00000039093, ENSDARG00000008155, ENSDARG00000017772
dre00280:Valine, leucine and isoleucine degradation	16	0.02133760938697689	ENSDARG00000054849, ENSDARG00000038910, ENSDARG00000028982, ENSDARG00000001578, ENSDARG00000053485, ENSDARG00000040555, ENSDARG00000012468, ENSDARG00000021220, ENSDARG00000007959, ENSDARG00000102538, ENSDARG00000103025, ENSDARG00000006031, ENSDARG00000014676, ENSDARG00000045888, ENSDARG00000101561, ENSDARG00000013063
dre04260:Cardiac muscle contraction	40	2.23704e+08	ENSDARG00000014794, ENSDARG00000011146, ENSDARG00000052360, ENSDARG00000104682, ENSDARG00000087402, ENSDARG00000057911, ENSDARG00000019856, ENSDARG00000068738, ENSDARG00000088383, ENSDARG00000070626, ENSDARG00000029064, ENSDARG00000095273, ENSDARG00000022438, ENSDARG00000023963, ENSDARG00000034424, ENSDARG00000053217, ENSDARG00000052304, ENSDARG00000059128, ENSDARG00000054907, ENSDARG00000104139,…
dre04261:Adrenergic signaling in cardiomyocytes	55	1.03861e+12	ENSDARG00000077722, ENSDARG00000052360, ENSDARG00000104682, ENSDARG00000100349, ENSDARG00000014428, ENSDARG00000020926, ENSDARG00000028721, ENSDARG00000087402, ENSDARG00000019856, ENSDARG00000042021, ENSDARG00000021647, ENSDARG00000023963, ENSDARG00000087205, ENSDARG00000045836, ENSDARG00000099241, ENSDARG00000104139, ENSDARG00000007791, ENSDARG00000005162, ENSDARG00000070573, ENSDARG00000068246,…
dre04510:Focal adhesion	65	1.70723e+12	ENSDARG00000101637, ENSDARG00000004561, ENSDARG00000013755, ENSDARG00000036279, ENSDARG00000079752, ENSDARG00000002589, ENSDARG00000020785, ENSDARG00000103959, ENSDARG00000018820, ENSDARG00000012593, ENSDARG00000087205, ENSDARG00000074908, ENSDARG00000020007, ENSDARG00000099841, ENSDARG00000070573, ENSDARG00000071863, ENSDARG00000006314, ENSDARG00000035809, ENSDARG00000018328, ENSDARG00000031678,…
dre04514:Cell adhesion molecules (CAMs)	39	7.23887e+11	ENSDARG00000102855, ENSDARG00000006396, ENSDARG00000014792, ENSDARG00000043716, ENSDARG00000045391, ENSDARG00000042357, ENSDARG00000102750, ENSDARG00000058682, ENSDARG00000005754, ENSDARG00000017320, ENSDARG00000104786, ENSDARG00000061282, ENSDARG00000007220, ENSDARG00000043128, ENSDARG00000044569, ENSDARG00000058969, ENSDARG00000100887, ENSDARG00000061647, ENSDARG00000071863, ENSDARG00000006314,…
dre04530:Tight junction	47	0.0011773262526238847	ENSDARG00000011777, ENSDARG00000059809, ENSDARG00000019917, ENSDARG00000013582, ENSDARG00000043716, ENSDARG00000036252, ENSDARG00000003008, ENSDARG00000004561, ENSDARG00000001431, ENSDARG00000013755, ENSDARG00000021647, ENSDARG00000042357, ENSDARG00000035438, ENSDARG00000002589, ENSDARG00000042803, ENSDARG00000070651, ENSDARG00000087205, ENSDARG00000003169, ENSDARG00000099221, ENSDARG00000017320,…
dre04520:Adherens junction	28	0.0067468642653073264	ENSDARG00000013582, ENSDARG00000014113, ENSDARG00000001431, ENSDARG00000045094, ENSDARG00000013755, ENSDARG00000102750, ENSDARG00000005754, ENSDARG00000025319, ENSDARG00000005941, ENSDARG00000070573, ENSDARG00000079374, ENSDARG00000007219, ENSDARG00000023940, ENSDARG00000018328, ENSDARG00000029472, ENSDARG00000062831, ENSDARG00000074849, ENSDARG00000014222, ENSDARG00000034434, ENSDARG00000031894,…
dre04512:ECM-receptor interaction	23	0.01274766946826741	ENSDARG00000071863, ENSDARG00000006314, ENSDARG00000035809, ENSDARG00000101209, ENSDARG00000031678, ENSDARG00000079388, ENSDARG00000059997, ENSDARG00000061436, ENSDARG00000028507, ENSDARG00000104110, ENSDARG00000036279, ENSDARG00000079752, ENSDARG00000012405, ENSDARG00000020785, ENSDARG00000059906, ENSDARG00000012593, ENSDARG00000042282, ENSDARG00000074908, ENSDARG00000020007, ENSDARG00000077231,…
dre04310:Wnt signaling pathway	48	1.71655e+12	ENSDARG00000010515, ENSDARG00000101637, ENSDARG00000057456, ENSDARG00000013582, ENSDARG00000014962, ENSDARG00000102730, ENSDARG00000057007, ENSDARG00000100349, ENSDARG00000004561, ENSDARG00000045094, ENSDARG00000052674, ENSDARG00000009870, ENSDARG00000044062, ENSDARG00000029501, ENSDARG00000071395, ENSDARG00000069360, ENSDARG00000004988, ENSDARG00000009689, ENSDARG00000058868, ENSDARG00000031888,…
dre04012:ErbB signaling pathway	32	0.0018688884877679892	ENSDARG00000043361, ENSDARG00000102730, ENSDARG00000004561, ENSDARG00000009870, ENSDARG00000086585, ENSDARG00000018476, ENSDARG00000029501, ENSDARG00000077177, ENSDARG00000103959, ENSDARG00000071395, ENSDARG00000018060, ENSDARG00000031888, ENSDARG00000087205, ENSDARG00000017803, ENSDARG00000099841, ENSDARG00000014273, ENSDARG00000053617, ENSDARG00000070573, ENSDARG00000043531, ENSDARG00000105276,…
dre04070:Phosphatidylinositol signaling system	31	0.0032555321183827474	ENSDARG00000029291, ENSDARG00000004561, ENSDARG00000035577, ENSDARG00000053878, ENSDARG00000018060, ENSDARG00000078106, ENSDARG00000058114, ENSDARG00000019549, ENSDARG00000074149, ENSDARG00000099841, ENSDARG00000004616, ENSDARG00000070412, ENSDARG00000037101, ENSDARG00000003776, ENSDARG00000059411, ENSDARG00000056623, ENSDARG00000068246, ENSDARG00000034187, ENSDARG00000100786, ENSDARG00000060626,…
dre04370:VEGF signaling pathway	24	0.008559581972528764	ENSDARG00000041065, ENSDARG00000070573, ENSDARG00000057456, ENSDARG00000014962, ENSDARG00000058381, ENSDARG00000004561, ENSDARG00000028721, ENSDARG00000004672, ENSDARG00000042021, ENSDARG00000034409, ENSDARG00000025106, ENSDARG00000074849, ENSDARG00000038524, ENSDARG00000069360, ENSDARG00000018060, ENSDARG00000058470, ENSDARG00000020795, ENSDARG00000098497, ENSDARG00000004988, ENSDARG00000087205,…
dre04912:GnRH signaling pathway	31	0.012456587190354515	ENSDARG00000102730, ENSDARG00000058381, ENSDARG00000100349, ENSDARG00000028721, ENSDARG00000009870, ENSDARG00000042021, ENSDARG00000053326, ENSDARG00000077177, ENSDARG00000071395, ENSDARG00000017676, ENSDARG00000058470, ENSDARG00000031888, ENSDARG00000045836, ENSDARG00000035178, ENSDARG00000074149, ENSDARG00000053617, ENSDARG00000014273, ENSDARG00000002235, ENSDARG00000070573, ENSDARG00000043531,…
dre04068:FoxO signaling pathway	40	0.0232733627953513	ENSDARG00000101637, ENSDARG00000010246, ENSDARG00000102730, ENSDARG00000035557, ENSDARG00000058381, ENSDARG00000045094, ENSDARG00000028721, ENSDARG00000009870, ENSDARG00000042021, ENSDARG00000042690, ENSDARG00000073710, ENSDARG00000018060, ENSDARG00000044183, ENSDARG00000058470, ENSDARG00000031888, ENSDARG00000087205, ENSDARG00000027200, ENSDARG00000029018, ENSDARG00000045836, ENSDARG00000052122,…
dre04145:Phagosome	40	0.004973120175075806	ENSDARG00000039522, ENSDARG00000021669, ENSDARG00000076318, ENSDARG00000013443, ENSDARG00000060948, ENSDARG00000006260, ENSDARG00000015174, ENSDARG00000031164, ENSDARG00000055216, ENSDARG00000007257, ENSDARG00000023967, ENSDARG00000041417, ENSDARG00000061140, ENSDARG00000104436, ENSDARG00000044605, ENSDARG00000036577, ENSDARG00000092610, ENSDARG00000020497, ENSDARG00000022315, ENSDARG00000001889,…
dre05132:Salmonella infection	27	0.007439601280832981	ENSDARG00000099740, ENSDARG00000102730, ENSDARG00000058381, ENSDARG00000014113, ENSDARG00000028721, ENSDARG00000009870, ENSDARG00000042021, ENSDARG00000060948, ENSDARG00000018820, ENSDARG00000058470, ENSDARG00000031888, ENSDARG00000020497, ENSDARG00000045836, ENSDARG00000014717, ENSDARG00000070573, ENSDARG00000103195, ENSDARG00000079374, ENSDARG00000035924, ENSDARG00000074488, ENSDARG00000043531,…
