# Supplementary material for: Iron Overload Is Associated With Oxidative Stress and Nutritional Immunity During Viral Infection in Fish
Source: Front Immunol. 2018 Jun 5;9:1296. doi: 10.3389/fimmu.2018.01296 (PMC5996096; doi:10.3389/fimmu.2018.01296)
Supplement: Supplementary file 3 [file table_3.xlsx]

## Sheet: Hoja1
Supplementary Table 3. Functional enrichment for upregulated genes using KEGG pathway
Term	Count	PValue	Genes
dre03010:Ribosome	77	1.22708e-08	ENSDARG00000006691, ENSDARG00000099380, ENSDARG00000005791, ENSDARG00000023298, ENSDARG00000098458, ENSDARG00000056903, ENSDARG00000070849, ENSDARG00000099104, ENSDARG00000058451, ENSDARG00000003599, ENSDARG00000100392, ENSDARG00000007320, ENSDARG00000037350, ENSDARG00000013307, ENSDARG00000035860, ENSDARG00000070437, ENSDARG00000010160, ENSDARG00000077717, ENSDARG00000103007, ENSDARG00000042905,…
dre03008:Ribosome biogenesis in eukaryotes	36	1.85715e+07	ENSDARG00000104353, ENSDARG00000098433, ENSDARG00000023299, ENSDARG00000012495, ENSDARG00000101900, ENSDARG00000057026, ENSDARG00000016484, ENSDARG00000102333, ENSDARG00000076526, ENSDARG00000025332, ENSDARG00000042520, ENSDARG00000017675, ENSDARG00000038312, ENSDARG00000077264, ENSDARG00000054540, ENSDARG00000011079, ENSDARG00000002720, ENSDARG00000069422, ENSDARG00000054154, ENSDARG00000015352,…
dre00480:Glutathione metabolism	17	0.036620713962631946	ENSDARG00000020711, ENSDARG00000071065, ENSDARG00000018146, ENSDARG00000078258, ENSDARG00000018953, ENSDARG00000042428, ENSDARG00000043342, ENSDARG00000007377, ENSDARG00000014017, ENSDARG00000022165, ENSDARG00000022183, ENSDARG00000079932, ENSDARG00000042533, ENSDARG00000019236, ENSDARG00000023526, ENSDARG00000068478, ENSDARG00000015343
dre03040:Spliceosome	60	3272.1	ENSDARG00000011125, ENSDARG00000031346, ENSDARG00000038068, ENSDARG00000040440, ENSDARG00000023299, ENSDARG00000007092, ENSDARG00000018049, ENSDARG00000021924, ENSDARG00000056235, ENSDARG00000011020, ENSDARG00000009753, ENSDARG00000076283, ENSDARG00000068992, ENSDARG00000005945, ENSDARG00000036675, ENSDARG00000038635, ENSDARG00000101057, ENSDARG00000077732, ENSDARG00000058328, ENSDARG00000105037,…
dre03013:RNA transport	63	36285.5	ENSDARG00000016548, ENSDARG00000038290, ENSDARG00000076815, ENSDARG00000053047, ENSDARG00000057026, ENSDARG00000052649, ENSDARG00000016443, ENSDARG00000012222, ENSDARG00000015394, ENSDARG00000052178, ENSDARG00000038635, ENSDARG00000104889, ENSDARG00000077533, ENSDARG00000017445, ENSDARG00000002549, ENSDARG00000043884, ENSDARG00000041317, ENSDARG00000041397, ENSDARG00000077732, ENSDARG00000017219,…
dre00240:Pyrimidine metabolism	36	1.77364e+12	ENSDARG00000022218, ENSDARG00000102245, ENSDARG00000040443, ENSDARG00000013016, ENSDARG00000030700, ENSDARG00000013734, ENSDARG00000054334, ENSDARG00000026183, ENSDARG00000100028, ENSDARG00000033742, ENSDARG00000076169, ENSDARG00000006074, ENSDARG00000033916, ENSDARG00000100374, ENSDARG00000054929, ENSDARG00000052103, ENSDARG00000078619, ENSDARG00000099821, ENSDARG00000044807, ENSDARG00000035549,…
dre00030:Pentose phosphate pathway	12	0.01875334062074277	ENSDARG00000012987, ENSDARG00000005251, ENSDARG00000071065, ENSDARG00000103369, ENSDARG00000037506, ENSDARG00000006019, ENSDARG00000015524, ENSDARG00000056640, ENSDARG00000015343, ENSDARG00000021233, ENSDARG00000021366, ENSDARG00000098645
dre03030:DNA replication	20	1.00166e+11	ENSDARG00000054799, ENSDARG00000013016, ENSDARG00000002613, ENSDARG00000045308, ENSDARG00000078759, ENSDARG00000055969, ENSDARG00000042458, ENSDARG00000019507, ENSDARG00000060041, ENSDARG00000100028, ENSDARG00000037188, ENSDARG00000076169, ENSDARG00000089637, ENSDARG00000102798, ENSDARG00000040041, ENSDARG00000024204, ENSDARG00000011404, ENSDARG00000018891, ENSDARG00000003938, ENSDARG00000054155
dre04110:Cell cycle	47	1.78306e+10	ENSDARG00000101637, ENSDARG00000041361, ENSDARG00000035655, ENSDARG00000051923, ENSDARG00000051748, ENSDARG00000035559, ENSDARG00000026577, ENSDARG00000011094, ENSDARG00000075354, ENSDARG00000041502, ENSDARG00000007657, ENSDARG00000019000, ENSDARG00000019507, ENSDARG00000087937, ENSDARG00000015254, ENSDARG00000098529, ENSDARG00000058471, ENSDARG00000024204, ENSDARG00000087554, ENSDARG00000008141,…
dre03420:Nucleotide excision repair	17	0.0038179353612870465	ENSDARG00000054799, ENSDARG00000013016, ENSDARG00000002613, ENSDARG00000060510, ENSDARG00000055969, ENSDARG00000007657, ENSDARG00000042458, ENSDARG00000038030, ENSDARG00000020001, ENSDARG00000100028, ENSDARG00000060041, ENSDARG00000037188, ENSDARG00000076169, ENSDARG00000039754, ENSDARG00000021550, ENSDARG00000003938, ENSDARG00000054155
dre04210:Apoptosis	24	0.0071132896998256515	ENSDARG00000008434, ENSDARG00000005481, ENSDARG00000069290, ENSDARG00000044619, ENSDARG00000021239, ENSDARG00000035559, ENSDARG00000103021, ENSDARG00000074060, ENSDARG00000009748, ENSDARG00000102762, ENSDARG00000055966, ENSDARG00000099722, ENSDARG00000038524, ENSDARG00000017757, ENSDARG00000020623, ENSDARG00000079123, ENSDARG00000017905, ENSDARG00000018569, ENSDARG00000004392, ENSDARG00000036057,…
dre04115:p53 signaling pathway	22	0.01778231411696075	ENSDARG00000101637, ENSDARG00000020711, ENSDARG00000069290, ENSDARG00000070228, ENSDARG00000051923, ENSDARG00000051748, ENSDARG00000021239, ENSDARG00000035559, ENSDARG00000026577, ENSDARG00000056795, ENSDARG00000019417, ENSDARG00000099722, ENSDARG00000087937, ENSDARG00000013719, ENSDARG00000098529, ENSDARG00000020623, ENSDARG00000017905, ENSDARG00000087554, ENSDARG00000043581, ENSDARG00000013681,…
dre04630:Jak-STAT signaling pathway	35	0.0010359855259124155	ENSDARG00000040332, ENSDARG00000068858, ENSDARG00000101637, ENSDARG00000018882, ENSDARG00000051748, ENSDARG00000025607, ENSDARG00000104474, ENSDARG00000090834, ENSDARG00000068711, ENSDARG00000020625, ENSDARG00000028731, ENSDARG00000017757, ENSDARG00000006266, ENSDARG00000059001, ENSDARG00000100020, ENSDARG00000045557, ENSDARG00000015902, ENSDARG00000052157, ENSDARG00000102434, ENSDARG00000080020,…
dre04623:Cytosolic DNA-sensing pathway	16	0.0026938003542958983	ENSDARG00000005481, ENSDARG00000036625, ENSDARG00000025607, ENSDARG00000104516, ENSDARG00000013734, ENSDARG00000045661, ENSDARG00000026183, ENSDARG00000040076, ENSDARG00000079123, ENSDARG00000008165, ENSDARG00000069733, ENSDARG00000090965, ENSDARG00000006677, ENSDARG00000098696, ENSDARG00000076251, ENSDARG00000007693
dre05168:Herpes simplex infection	48	0.00641096430822311	ENSDARG00000040332, ENSDARG00000005481, ENSDARG00000018882, ENSDARG00000093182, ENSDARG00000103021, ENSDARG00000035559, ENSDARG00000025607, ENSDARG00000026577, ENSDARG00000069482, ENSDARG00000045661, ENSDARG00000010169, ENSDARG00000104276, ENSDARG00000058740, ENSDARG00000102998, ENSDARG00000045513, ENSDARG00000012694, ENSDARG00000020625, ENSDARG00000006266, ENSDARG00000079123, ENSDARG00000017905,…
dre00860:Porphyrin and chlorophyll metabolism	15	5.74132e+11	ENSDARG00000032862, ENSDARG00000003462, ENSDARG00000027491, ENSDARG00000021059, ENSDARG00000006818, ENSDARG00000027529, ENSDARG00000059857, ENSDARG00000100372, ENSDARG00000096829, ENSDARG00000055991, ENSDARG00000008840, ENSDARG00000102167, ENSDARG00000062025, ENSDARG00000038643, ENSDARG00000063126
